# Supplementary material
Source: PubMed Central journal article supplement (PMC3447078)
Supplement: supp_112102_blad-johnson-1-at.pdf [file supp_112102_blad-johnson-1-at.pdf]

## Appendix 1: Sample search strategy (MEDLINE)

### *Ovid MEDLINE(R) In-Process & Other Non-Indexed Citations and Ovid MEDLINE(R) 1948 to Present*

1. thiazoles/ or thiazolidinediones/
2. rosiglitazone.mp.
3. pioglitazone.mp.
4. troglitazone.mp.
5. (avandia or actos or rozulin).mp. [mp=protocol supplementary concept, rare disease supplementary concept, title, original title, abstract, name of substance word, subject heading word, unique identifier]
6. glitazone.mp.
7. or/1-6
8. diabetes mellitus/ or exp diabetes mellitus, type 2/ or donohue syndrome/
9. ((diabet\* or DM) adj5 ("type 2" or "type ii" or matur\* onset or late onset)).mp.
10. T2DM.ti,ab.
11. (gestation\* or pregnan\*).ti.
12. or/8-10
13. 12 not 11
14. exp Neoplasms/
15. (cancer\* or malignan\* or carcino\* or neoplas\* or tumor\* or tumour\* or metastas\*).mp.
16. (melanoma\* or sarcoma\* or adenoma\* or adenocarcinoma\* or adenocarcinoma\* or carcinosarcoma\* or chondrosarcoma\* or fibrosarcoma\* or dermatofibrosarcoma\* or neurofibrosarcoma\* or hemangiosarcoma\* or leiomyosarcoma\* or liposarcoma\* or myosarcoma\* or rhabdomyosarcoma\* or myxosarcoma\* or osteosarcoma\* or lymphoma\*).mp.
17. or/14-16
18. (necrosis or TNF).ti.
19. 17 not 18
20. 7 and 13 and 19
21. limit 20 to (comment or editorial or news or newspaper article or letter)
22. 20 not 21
